# Supplementary material
Source: PubMed Central journal article supplement (PMC9096913)
Supplement: NIHMS1633801-supplement-1.pdf [file NIHMS1633801-supplement-1.pdf]

## Supplementary Methods

### *Subjects and Definitions*

First, we identified patients with 2 or more International Classification of Diseases–Ninth Revision–Clinical Modification or International Classification of Diseases–Tenth Revision–Clinical Modification nonalcoholic fatty liver disease (NAFLD) codes at least 30 days apart. The algorithm used at least 2 NAFLD codes to increase the disease specificity because NAFLD codes can include other causes of chronic liver disease, especially when used as an indication for an imaging test. From this initial cohort, we excluded patients with additional International Classification of Diseases–Ninth Revision–Clinical Modification or International Classification of Diseases–Tenth Revision–Clinical Modification codes of chronic diffuse parenchymal liver diseases, such as viral hepatitis, alcohol-related liver disease, cholestatic, autoimmune, congestive liver disease and others ([Supplementary Table 1](#)). Because focal diseases can be identified on imaging and region of interest can be drawn around the lesion for liver stiffness measurement (LSM), these diseases were not excluded as long as they were not diffuse. The decision to include/exclude focal and granulomatous diseases were made case by case basis. International Classification of Diseases codes were used solely to gather as much NAFLD patients as possible, not for the purpose of diagnosis or fibrosis quantification. The remaining subjects formed the final study cohort.

### *Magnetic Resonance Elastography*

Each subject underwent magnetic resonance elastography (MRE), as part of the routine clinical evaluation of NAFLD with a 1.5T or 3.0T MR system (various models, GE Medical Systems, Milwaukee, WI). The MRE wave, stiffness, and anatomic images were analyzed by using an in-house, fully automated algorithm for hepatic stiffness measurements described by Dzyubak et al.<sup>1</sup> The mean LSM was automatically calculated for all patients. During chart review of every participant, the automated stiffness was compared to the reported kPa in the clinical radiology report. If the difference was found more than 1.0 kPa, cases were sent to a professional reader with over 12 years of experience in MRE and abdominal imaging (M.Y.) for reanalysis.

### *Statistical Analysis*

Missing values for Model for End-Stage Liver Disease Sodium (30 of 178) were imputed using multivariate imputation by chained equations.<sup>2</sup> Using methods described by Rubin<sup>3</sup> and Lie et al,<sup>4</sup> results of 9 multivariate imputation by chained equations–imputed data sets were used to generate the hazard ratio, 95% confidence interval, and *P* values for the Cox regression model predicting the decompensation or death outcome.

Spearman correlation was used to assess the agreement between LSM by MRE and fibrosis stage for the subset of participants with matched liver biopsy within 6 months of MRE. Increase in LSM per 1-stage increase in fibrosis stage was calculated. The statistical analyses were performed using R (version 3.4.2; R Foundation for Statistical Computing, Vienna, Austria) software package.

## Supplementary Discussion

In this patient population of noncirrhotic NAFLD, the number of outcomes (*n* = 20 developed cirrhosis) allowed the inclusion of only 1 exploratory risk factor in addition to the predictor of interest (LSM). We chose age as the most important covariate, based on previous studies<sup>5</sup> demonstrating its importance as a risk factor for disease progression in NAFLD. Other covariates, such as diabetes mellitus, hypertension, and weight, are important candidates to consider in future larger studies.

## Supplementary References

1. Dzyubak B, Glaser K, Yin M, et al. Automated liver stiffness measurements with magnetic resonance elastography. *J Magn Reson Imaging* 2013;38:371–379.
2. White IR, Royston P, Wood AM. Multiple imputation using chained equations: Issues and guidance for practice. *Stat Med* 2011;30:377–399.
3. Rubin DB. *Multiple Imputation for Nonresponse in Surveys*. New York, NY: Wiley, 1987.
4. Li KH, Raghunathan TE, Rubin DB. Large-sample significance levels from multiply imputed data using moment-based statistics and an F reference distribution. *J Am Stat Assoc* 1991;86:1065–1073.
5. Argo CK, Northup PG, Al-Osaimi AM, et al. Systematic review of risk factors for fibrosis progression in non-alcoholic steatohepatitis. *J Hepatol* 2009;51:371–379.

# Timeline of events

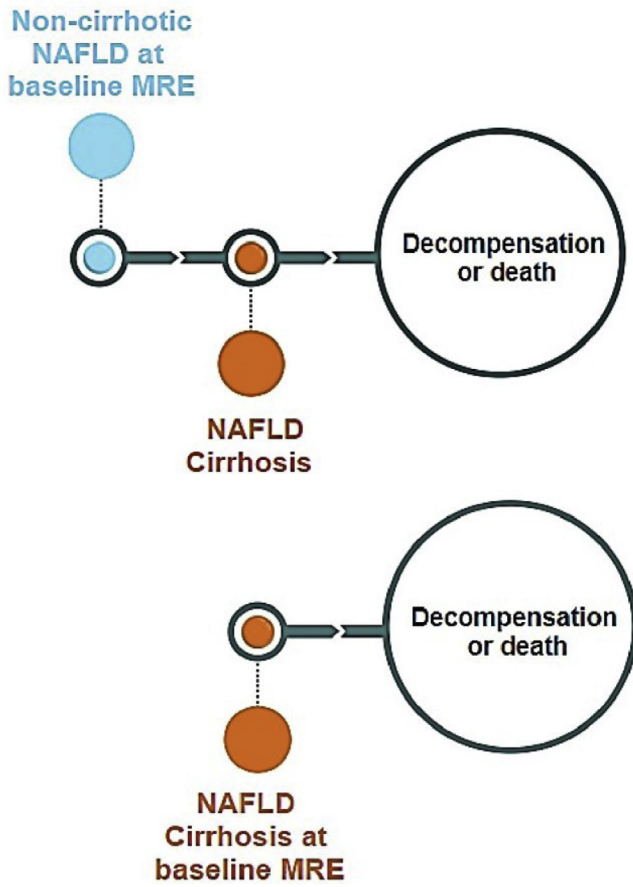

**Supplementary Figure 1.** Timeline of events including cirrhosis development and decompensation or death.

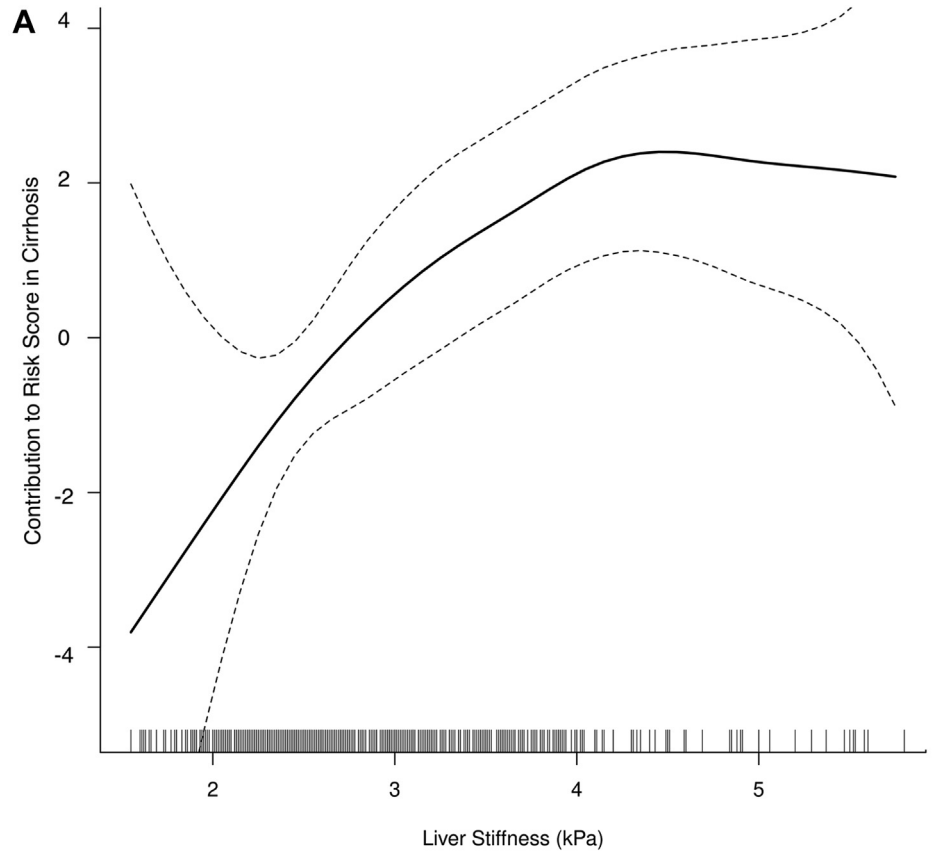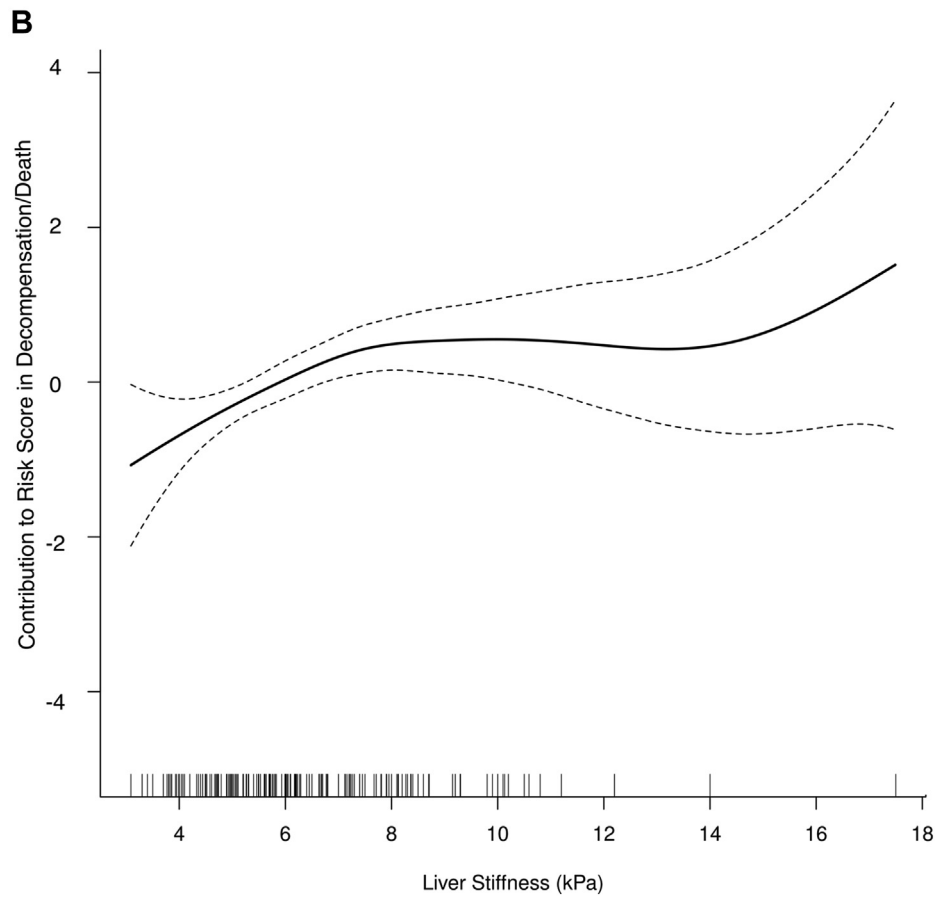

**Supplementary Figure 2.** P-splines for Liver Stiffness. (A) Predicting cirrhosis. (B) Predicting decompensation.

**Supplementary Table 1.** Codes for NAFLD Inclusion, Exclusion, Cirrhosis, and Decompensation

## NAFLD inclusion codes

|     |        |                                                              |
|-----|--------|--------------------------------------------------------------|
| I9  | 571.5  | CIRRHOSIS OF LIVER WITHOUT MENTION OF ALCOHOL                |
| I9  | 571.8  | OTHER CHRONIC NONALCOHOLIC LIVER DISEASE                     |
| I9  | 571.9  | UNSPECIFIED CHRONIC LIVER DISEASE WITHOUT MENTION OF ALCOHOL |
| I10 | K74.60 | UNSPECIFIED CIRRHOSIS OF LIVER                               |
| I10 | K74.69 | CIRRHOSIS CRYPTOGENIC (HCC)                                  |
| I10 | K75.81 | NONALCOHOLIC STEATOHEPATITIS (NASH)                          |
| I10 | K76.0  | FATTY (CHANGE OF) LIVER, NOT ELSEWHERE CLASSIFIED            |

## NAFLD exclusion codes

|     |           |                                                                  |
|-----|-----------|------------------------------------------------------------------|
| I9  | 303.00-03 | Acute alcoholic intoxication                                     |
| I9  | 303.90-93 | OTHER AND UNSPECIFIED ALCOHOL DEPENDENCE                         |
| I9  | 571.0-3   | CHRONIC ALCOHOLIC LIVER DISEASE                                  |
| I9  | 571.1     | ACUTE ALCOHOLIC HEPATITIS                                        |
| I9  | 571.6     | Biliary cirrhosis                                                |
| I9  | 275.01    | HEREDITARY HEMOCHROMATOSIS                                       |
| I9  | 070.0-9   | VIRAL HEPATITIS                                                  |
| I9  | 072.71    | MUMPS HEPATITIS                                                  |
| I9  | 091.62    | Secondary syphilitic hepatitis                                   |
| I9  | 130.5     | Hepatitis due to toxoplasmosis                                   |
| I9  | 571.42    | Autoimmune hepatitis                                             |
| I9  | 571.49    | OTHER CHRONIC HEPATITIS                                          |
| I9  | 573.1     | HEPATITIS IN VIRAL DISEASES CLASSIFIED ELSEWHERE                 |
| I9  | 573.2     | Hepatitis in other infectious diseases classified elsewhere      |
| I9  | 573.3     | HEPATITIS, UNSPECIFIED                                           |
| I9  | V02.60-9  | Carrier or suspected carrier of viral hepatitis                  |
| I9  | 576.1     | CHOLANGITIS                                                      |
| I10 | F10.1-99  | ALCOHOL ABUSE                                                    |
| I10 | K70.0-9   | ALCOHOLIC LIVER DISEASE                                          |
| I10 | K74.3     | Cirrhosis Biliary Primary (HCC)                                  |
| I10 | K74.4     | SECONDARY BILIARY CIRRHOSIS                                      |
| I10 | K74.5     | Cirrhosis Biliary (HCC)                                          |
| I10 | K76.89    | OTHER SPECIFIED DISEASES OF LIVER                                |
| I10 | K76.9     | LIVER DISEASE, UNSPECIFIED                                       |
| I10 | E83.110-9 | HEMOCHROMATOSIS                                                  |
| I10 | A18.83    | Tuberculosis of digestive tract organs, not elsewhere classified |
| I10 | A51.45    | Secondary syphilitic hepatitis                                   |
| I10 | B00.81    | Herpesviral hepatitis                                            |
| I10 | B15-19    | VIRAL HEPATITIS                                                  |
| I10 | B25.1     | Cytomegaloviral hepatitis                                        |
| I10 | B26.81    | Mumps hepatitis                                                  |
| I10 | B58.1     | Toxoplasma hepatitis                                             |

Supplementary Table 1. Continued

|                      |           |                                                                       |
|----------------------|-----------|-----------------------------------------------------------------------|
| I10                  | B94.2     | Sequelae of viral hepatitis                                           |
| I10                  | K71.2-6   | TOXIC LIVER DISEASE WITH HEPATITIS                                    |
| I10                  | K73.0-9   | Chronic hepatitis, not elsewhere classified                           |
| I10                  | K75.2     | Nonspecific reactive hepatitis                                        |
| I10                  | K75.3     | GRANULOMATOUS HEPATITIS, NOT ELSEWHERE CLASSIFIED                     |
| I10                  | K75.4     | Hepatitis Autoimmune                                                  |
| I10                  | O98.413   | Viral hepatitis complicating pregnancy, childbirth and the puerperium |
| I10                  | P35.3     | Congenital viral hepatitis                                            |
| I10                  | Z22.50-9  | Carrier of viral hepatitis                                            |
| I10                  | K83.0     | Cholangitis Acute                                                     |
| CIRRHOSIS codes      |           |                                                                       |
| I9                   | 571.5     | CIRRHOSIS OF LIVER WITHOUT MENTION OF ALCOHOL                         |
| I10                  | K74.60    | UNSPECIFIED CIRRHOSIS OF LIVER                                        |
| I10                  | K74.69    | Cirrhosis Cryptogenic (HCC)                                           |
| DECOMPENSATION codes |           |                                                                       |
| I9                   | 785.59    | OTHER SHOCK WITHOUT MENTION OF TRAUMA                                 |
| I9                   | 456.0     | Esophageal Varix With Bleeding                                        |
| I9                   | 456.20    | ESOPHAGEAL VARICES IN DISEASES CLASSIFIED ELSEWHERE, WITH BL          |
| I9                   | 155.1     | MALIGNANT NEOPLASM OF INTRAHEPATIC BILE DUCTS                         |
| I9                   | 155.0     | MALIGNANT NEOPLASM OF LIVER, PRIMARY                                  |
| I9                   | 572.2     | HEPATIC ENCEPHALOPATHY                                                |
| I9                   | 572.4     | HEPATORENAL SYNDROME                                                  |
| I9                   | 567.23    | SPONTANEOUS BACTERIAL PERITONITIS                                     |
| I9                   | 50.59     | Other Transplant of Liver                                             |
| I9                   | 996.82    | COMPLICATIONS OF TRANSPLANTED LIVER                                   |
| I9                   | V42.7     | LIVER REPLACED BY TRANSPLANT                                          |
| I9                   | 456.0     | Esophageal Varix With Bleeding                                        |
| I9                   | 456.1     | ESOPHAGEAL VARICES WITHOUT MENTION OF BLEEDING                        |
| I9                   | 456.20-1  | ESOPHAGEAL VARICES IN DISEASES CLASSIFIED ELSEWHERE                   |
| I10                  | R18.8     | Other ascites                                                         |
| I10                  | I85.01    | ESOPHAGEAL VARICES WITH BLEEDING                                      |
| I10                  | I85.11    | Secondary esophageal varices with bleeding (HCC)                      |
| I10                  | C22.1     | Cholangiocarcinoma (HCC)                                              |
| I10                  | C22.0     | Malignant Neoplasm Of Liver Hepatocellular (HCC)                      |
| I10                  | K72.91    | HEPATIC FAILURE, UNSPECIFIED WITH COMA                                |
| I10                  | K76.7     | HEPATORENAL SYNDROME                                                  |
| I10                  | I85.00    | Varix Esophageal (HCC)                                                |
| I10                  | I85.10    | Secondary esophageal varices without bleeding (HCC)                   |
| I10                  | K65.2     | Spontaneous bacterial peritonitis (HCC)                               |
| I10                  | 0FY00Z0-2 | TRANSPLANTATION OF LIVER                                              |
| I10                  | T86.40    | Complication Liver Transplant (HCC)                                   |
| I10                  | T86.41    | LIVER TRANSPLANT REJECTION                                            |

**Supplementary Table 1.** Continued

|     |        |                                                     |
|-----|--------|-----------------------------------------------------|
| I10 | T86.42 | Liver transplant failure (HCC)                      |
| I10 | T86.43 | LIVER TRANSPLANT INFECTION                          |
| I10 | T86.49 | Other complications of liver transplant (HCC)       |
| I10 | Z94.4  | LIVER TRANSPLANT STATUS                             |
| I10 | I85.00 | Varix Esophageal (HCC)                              |
| I10 | I85.01 | ESOPHAGEAL VARICES WITH BLEEDING                    |
| I10 | I85.10 | Secondary esophageal varices without bleeding (HCC) |
| I10 | I85.11 | Secondary esophageal varices with bleeding (HCC)    |

HCC, hepatocellular carcinoma.

**Supplementary Table 2.** Distribution of Baseline Non-cirrhotic Patients With Matched LSM and Fibrosis Stage Per Biopsy

|     |       | Fibrosis stage |   |                |   |   |
|-----|-------|----------------|---|----------------|---|---|
|     |       | 0              | 1 | 2              | 3 | 4 |
| LSM | <3    | 2              | 5 | 3              | 0 | 0 |
|     | 3-3.5 | 3              | 2 | 1              | 0 | 0 |
|     | 3.5-4 | 1              | 2 | 1              | 1 | 0 |
|     | 4-5   | 0              | 0 | 1              | 7 | 0 |
|     | 5+    | 0              | 0 | 3 <sup>a</sup> | 0 | 0 |

LSM, liver stiffness measurement.

<sup>a</sup>Of the 3 patients with fibrosis stage 2 and LSM >5 kPa had superimposed conditions in addition to nonalcoholic steatohepatitis (1 had sarcoidosis, 1 had a 2.4-cm focal nodular hyperplasia) while 1 had cross-sectional imaging supportive of cirrhosis and suboptimal liver sample with 4 portal tracts). Spearman correlation = 0.6.

**Supplementary Table 3.** Distribution of Baseline Compensated Cirrhotic Patients With Matched LSM and Fibrosis Stage Per Biopsy

|     |       | Fibrosis stage |   |                |                |    |
|-----|-------|----------------|---|----------------|----------------|----|
|     |       | 0              | 1 | 2              | 3              | 4  |
| LSM | <3    | 0              | 1 | 0              | 0              | 0  |
|     | 3-3.5 | 0              | 0 | 0              | 0              | 1  |
|     | 3.5-4 | 0              | 0 | 0              | 0              | 1  |
|     | 4-5   | 0              | 0 | 0              | 1              | 4  |
|     | 5+    | 0              | 0 | 1 <sup>a</sup> | 6 <sup>a</sup> | 19 |

LSM, liver stiffness measurement.

<sup>a</sup>Among the 7 patients with LSM >5 kPa and fibrosis stage <4, all had cross-sectional imaging supportive of cirrhosis (nodular liver, portal hypertension, splenomegaly), supporting the underestimation of fibrosis stage by biopsy.
